# Supplementary material for: Combined interventions to reduce HIV incidence in KwaZulu-Natal: a modelling study
Source: Springer Nature journal article supplement (doi:10.1186/s12879-017-2612-5), 2017-07-26
Supplement: MOESM1 [file 13330544]

## **Appendix**

### **Combined interventions to reduce HIV incidence in KwaZulu-Natal: a modelling study**

Stéphanie Blaizot, Helena Huerga, Benjamin Riche, Tom Ellman, Amir Shroufi, Jean-François Etard, René Ecochard

## Mathematical model

A detailed description of the mathematical model and the estimation method of the model parameters can be found in Reference [1]. Here, we described briefly the main characteristics of the mathematical model.

The model, shown in Figure S1, describes HIV transmission, the untreated-disease progression, and ART use in a heterosexual population. It splits the population into compartments according to sex, age, and HIV status. The population of infected individuals was split into three compartments according to the CD4 cell count and the ART status: 1) Compartment  $I_1$ : untreated HIV-positive individuals with CD4 cell count  $>350$  cells/mm<sup>3</sup>; 2) Compartment  $I_2$ : untreated HIV-positive individuals with CD4 cell count  $\leq 350$  cells/mm<sup>3</sup> (immunosuppressed individuals); and, 3) Compartment  $T$ : HIV-positive individuals under ART. An additional Compartment  $S$  was dedicated to HIV-negative (or susceptible) individuals.

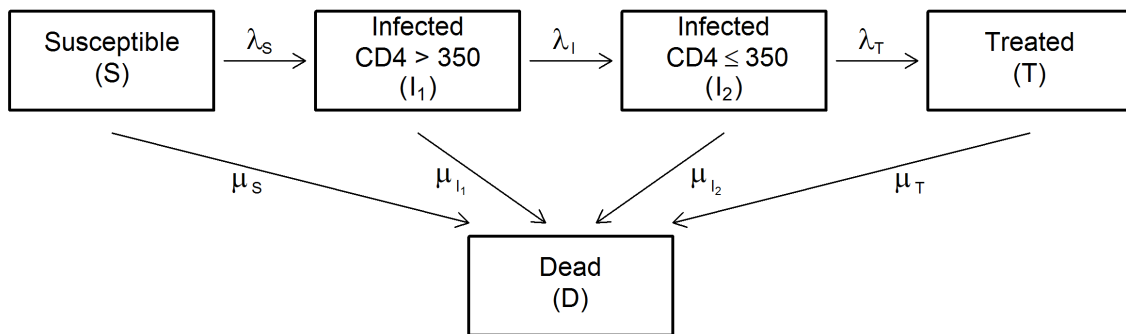

Figure S1. Simplified diagram of the model

### Notation

$S$ : susceptible individuals of the studied population

$I_1$ : HIV-positive and untreated individuals with CD4 cell count  $>350$  cells/mm<sup>3</sup>

$I_2$ : HIV-positive and untreated individuals with CD4 cell count  $\leq 350$  cells/mm<sup>3</sup>

$T$ : HIV-positive individuals on ART

$D$ : deceased individuals

$\lambda_s$ : force of infection

$\lambda_i$ : immunosuppression rate

$\lambda_T$ : treatment rate

$\mu_S$ : mortality rate of individuals in compartment S

$\mu_{I1}$ : mortality rate of individuals in compartment I<sub>1</sub>

$\mu_{I2}$ : mortality rate of individuals in compartment I<sub>2</sub>

$\mu_T$ : mortality rate of individuals in compartment T

### Differential equations

We formulated the predictive model as a system of sex and age-specific ( $a = 15, \dots, 59$  years) differential equations:

$$\begin{cases} \frac{dS_{Sex,a}}{dt} = -\lambda_{S,Sex,a} S_{Sex,a} - \mu_{S,Sex,a} S_{Sex,a} - \nu S_{Sex,a} + \nu S_{Sex,a-1} \\ \frac{dI_{1Sex,a}}{dt} = \lambda_{S,Sex,a} S_{Sex,a} - (\mu_{I_1,Sex,a} + \lambda_{I,Sex,a}) I_{1Sex,a} - \nu I_{1Sex,a} + \nu I_{1Sex,a-1} \\ \frac{dI_{2Sex,a}}{dt} = \lambda_{I_1,Sex,a} I_{1Sex,a} - (\mu_{I_2,Sex,a} + \lambda_{T,Sex,a}) I_{2Sex,a} - \nu I_{2Sex,a} + \nu I_{2Sex,a-1} \\ \frac{dT_{Sex,a}}{dt} = \lambda_{T,Sex,a} I_{2Sex,a} - \mu_{T,Sex,a} T_{Sex,a} - \nu T_{Sex,a} + \nu T_{Sex,a-1} \end{cases}$$

Ageing was considered through the last two terms of each equation;  $\nu$  being the rate at which an individual moves from one age class to another. For the first age class (15 years), ageing was taken into account as follows: at one year intervals, a fixed number of individuals were put into compartment S.

The force of infection is frequency-dependent; it included HIV prevalence in the opposite sex weighted by the infectiousness of HIV-positive individuals. This infectiousness (probability of transmitting the virus) depends on the viral load. This force of infection may then be written as follows:

$$\lambda_{S,Sex,a} = \tilde{\beta}_{Sex,a} \left( \frac{J_{OppositeSex}}{N_{OppositeSex}} \right) \zeta_{Sex,a}$$

with:

$\tilde{\beta}_{Sex,a}$  the transmission parameter;

$\zeta_{Sex,a} = (1 - \varphi_{Sex,a}) + \gamma\varphi_{Sex,a}$  allows us to take into account that some individuals, in proportion  $\varphi$ , have a different susceptibility (reduced by  $\gamma$ ) due to, for example, circumcision (in men);

$$J_{OppositeS\alpha} = I_{1OppositeS\alpha} \left[ (1 - propVLow_{I_1,OppositeS\alpha}) + propVLow_{I_1,OppositeS\alpha} \cdot \varepsilon \right] + \\ I_{2OppositeS\alpha} \left[ (1 - propVLow_{I_2,OppositeS\alpha}) + propVLow_{I_2,OppositeS\alpha} \cdot \varepsilon \right] + \\ T_{OppositeS\alpha} \left[ (1 - propVLow_{T,OppositeS\alpha}) + propVLow_{T,OppositeS\alpha} \cdot \varepsilon \right]$$

$propVLow_{X,OppositeSex}$  is the (baseline) proportion of individuals with a viral load below 1000 copies/mL in the compartment  $X$  and  $\varepsilon$  is the reduction of infectiousness in individuals with a viral load below 1000 copies/mL.

## Parameters

The model parameters are the following: i) the force of infection ( $\lambda_S$ ); ii) the "immunosuppression rate" ( $\lambda_I$ ); i.e., the rate at which an individual moves from  $> 350$  to  $\leq 350$  cells/mm<sup>3</sup> CD4 cell count; iii) the "treatment rate" ( $\lambda_T$ ) or the ART initiation rate; and, iv) the mortality rate ( $\mu$ ).

Estimating the model parameters included three stages. First, we used the HIV status, the ART status, and the CD4 cell count at the time of the survey to assign each individual to one of the above-cited compartments. Second, we derived individuals' states (as described by the compartments) during the past year from the individuals' histories (self-reported dates of first positive HIV test, last HIV test and its result, and ART initiation) and CD4 measurement. We used only the previous year to minimize the recall bias and avoid making too strong assumptions about individuals' histories. Third, we calculated the number of transitions between pairs of compartments and the time spent by each individual in each compartment.

The initial compartment sizes (i.e., the number of individuals in each compartment) stemmed from the MHIPS survey and applied on the 2011 census (Figures S2-S3).

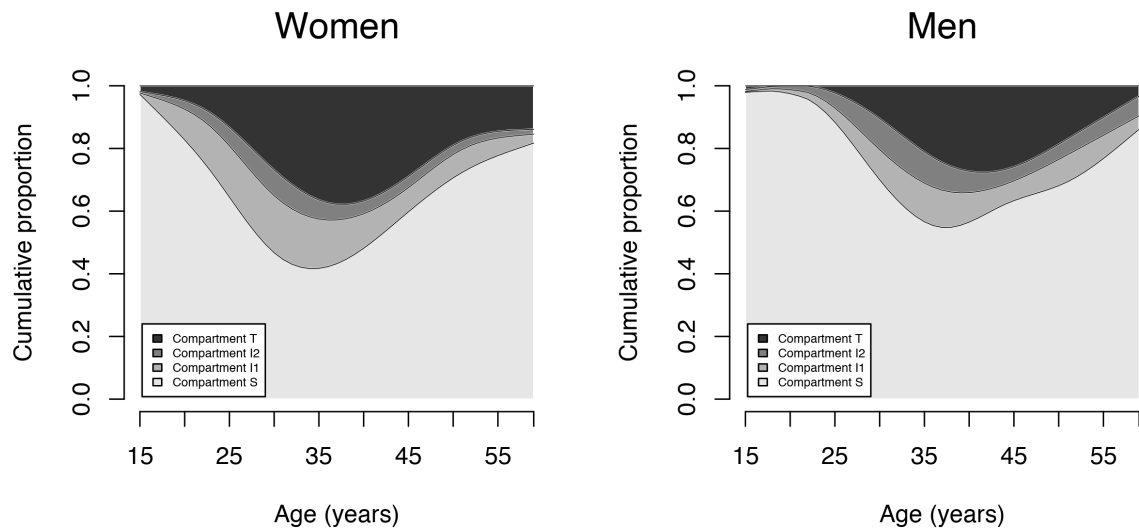

**Figure S2. Initial cumulative proportion of individuals in each compartment by sex and age**

S: susceptible individuals; I1: HIV-positive and untreated individuals with CD4 cell count  $>350$  cells/mm<sup>3</sup>; I2: HIV-positive and untreated individuals with CD4 cell count  $\leq 350$  cells/mm<sup>3</sup>; T: HIV-positive individuals on ART.

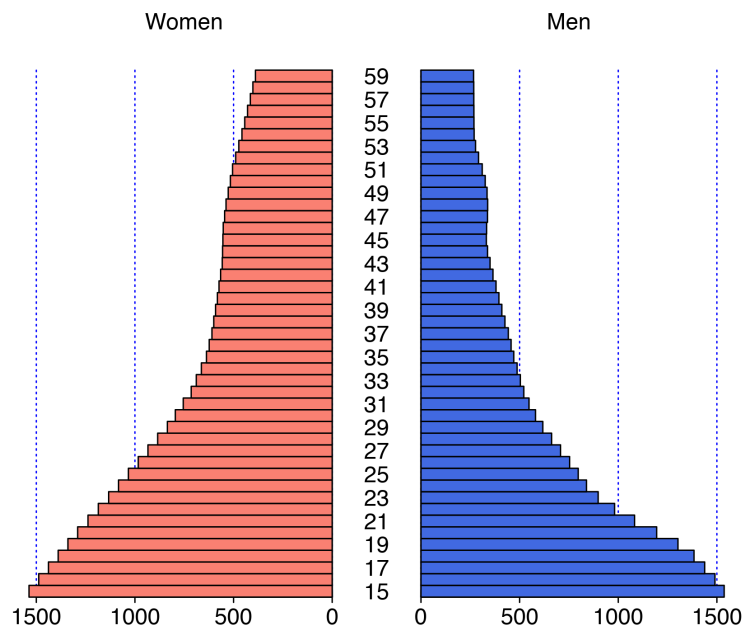

**Figure S3. Initial population size by sex and age (15-59 years)**

## ***Sensitivity analyses***

We assumed that individuals in compartments S, I<sub>1</sub>, and T had the same risk of death whereas individuals in compartment I<sub>2</sub> had an additional risk of death due to AIDS, and used mortality rates from another region in KwaZulu-Natal [2]. A sensitivity analysis was performed to assess the impact of this assumption on results: the mortality rates in individuals in compartments I<sub>1</sub> and T were varied with values being one tenth, one fifth, or half those in individuals in compartment I<sub>2</sub>.

**Table S1.** Percentage reduction of incidence rate compared to the baseline incidence rate depending on values of mortality rates after four years of interventions

|                                           | Overall | Men    | Women  | Aged 15-24 years | Aged 25-34 years | Aged 35-59 years |
|-------------------------------------------|---------|--------|--------|------------------|------------------|------------------|
| <b>No change<sup>a</sup></b>              | 24-29%  | 12-17% | 27-32% | 31-36%           | 29-34%           | 18-23%           |
| <b>ART at CD4&lt;500 at 55%, 75%, 85%</b> |         |        |        |                  |                  |                  |
| + Baseline VMMC (26%,21%,19%)             | 30-35%  | 24-28% | 31-35% | 35-40%           | 35-39%           | 27-31%           |
| + Increased VMMC at 70%, 21%, 19%         | 33-38%  | 33-36% | 32-36% | 38-43%           | 39-43%           | 27-32%           |
| + Increased VMMC at 35%, 25%, 20%         | 31-36%  | 26-30% | 31-36% | 36-40%           | 36-40%           | 28-32%           |
| <b>ART for all at 50%, 70%, 80%</b>       |         |        |        |                  |                  |                  |
| + Baseline VMMC (26%,21%,19%)             | 36-40%  | 33-37% | 35-39% | 40-44%           | 40-44%           | 34-38%           |
| + Increased VMMC at 70%,21%,19%           | 39-43%  | 41-44% | 36-40% | 43-46%           | 43-47%           | 35-39%           |
| + Increased VMMC at 35%, 25%,20%          | 37-41%  | 36-39% | 35-40% | 41-45%           | 41-45%           | 35-39%           |
| <b>ART for all at 50%, 70%, 80%</b>       |         |        |        |                  |                  |                  |
| + Increased PrEP at 20%,0%,0%             | 39-43%  | 34-38% | 40-44% | 45-49%           | 43-46%           | 35-39%           |
| + Increased PrEP at 40%, 0%, 0%           | 43-47%  | 35-38% | 44-48% | 51-54%           | 45-49%           | 36-39%           |
| + Increased PrEP at 15%, 10%, 5%          | 39-43%  | 34-38% | 39-43% | 44-48%           | 43-47%           | 36-40%           |

<sup>a</sup> No change in baseline interventions: ART at CD4<350 and baseline VMMC (i.e. VMMC coverage at 26%, 21%, and 19% among age groups 15-24, 25-34, and 35-59 years respectively; see Methods section)

The results of the sensitivity analysis assuming an annual drop-out from ART of 1.5% [3] or 5% [4] are shown in Table S2.

**Table S2.** Percentage reduction of incidence rate compared to the baseline incidence rate after four years of interventions depending on the value of annual drop-out from ART (left %: drop-out of 5%, right %: drop-out of 1.5%/year).

|                                           | Overall | Men    | Women  | Aged 15-24 years | Aged 25-34 years | Aged 35-59 years |
|-------------------------------------------|---------|--------|--------|------------------|------------------|------------------|
| No change <sup>a</sup>                    | 17-22%  | 3-9%   | 19-24% | 24-29%           | 22-27%           | 10-15%           |
| <b>ART at CD4&lt;500 at 55%, 75%, 85%</b> |         |        |        |                  |                  |                  |
| + Baseline VMMC (26%,21%,19%)             | 27-29%  | 23-23% | 27-29% | 32-34%           | 32-33%           | 25-26%           |
| + Increased VMMC at 70%, 21%, 19%         | 31-32%  | 32-32% | 28-30% | 35-37%           | 36-37%           | 26-26%           |
| + Increased VMMC at 35%, 25%, 20%         | 28-30%  | 26-25% | 27-30% | 33-35%           | 33-35%           | 26-26%           |
| <b>ART for all at 50%, 70%, 80%</b>       |         |        |        |                  |                  |                  |
| + Baseline VMMC (26%,21%,19%)             | 34-35%  | 33-33% | 33-34% | 38-39%           | 38-40%           | 33-34%           |
| + Increased VMMC at 70%,21%,19%           | 37-38%  | 40-41% | 34-35% | 41-42%           | 42-43%           | 34-34%           |
| + Increased VMMC at 35%, 25%,20%          | 35-36%  | 35-35% | 33-35% | 39-40%           | 39-41%           | 34-35%           |
| <b>ART for all at 50%, 70%, 80%</b>       |         |        |        |                  |                  |                  |
| + Increased PrEP at 20%,0%,0%             | 38-39%  | 33-34% | 38-39% | 44-45%           | 41-42%           | 34-35%           |
| + Increased PrEP at 40%, 0%, 0%           | 41-42%  | 34-35% | 42-44% | 49-50%           | 44-45%           | 34-35%           |
| + Increased PrEP at 15%, 10%, 5%          | 37-39%  | 33-34% | 37-39% | 42-44%           | 41-43%           | 34-35%           |

<sup>a</sup> No change in baseline interventions: ART at CD4<350 and baseline VMMC (i.e. VMMC coverage at 26%, 21%, and 19% among age groups 15-24, 25-34, and 35-59 years respectively; see Methods section)

## References

1. Blaizot S, Riche B, Maman D, Mukui I, Kirubi B, Etard JF, Ecochard R: **Estimation and Short-Term Prediction of the Course of the HIV Epidemic Using Demographic and Health Survey Methodology-Like Data.** *PLoS One* 2015, **10**(6):e0130387.
2. Nyirenda M, Hosegood V, Barnighausen T, Newell ML: **Mortality levels and trends by HIV serostatus in rural South Africa.** *AIDS* 2007, **21 Suppl 6**:S73-79.
3. Granich RM, Gilks CF, Dye C, De Cock KM, Williams BG: **Universal voluntary HIV testing with immediate antiretroviral therapy as a strategy for elimination of HIV transmission: a mathematical model.** *Lancet* 2009, **373**(9657):48-57.
4. Eaton JW, Menzies NA, Stover J, Cambiano V, Chindelevitch L, Cori A, Hontelez JAC, Humair S, Kerr CC, Klein DJ *et al*: **Health benefits, costs, and cost-effectiveness of**

**earlier eligibility for adult antiretroviral therapy and expanded treatment coverage: a combined analysis of 12 mathematical models.** *Lancet Glob Health* 2014, 2(1):E23-E34.
